# Supplementary material for: APE1-mediated DNA damage repair provides survival advantage for esophageal adenocarcinoma cells in response to acidic bile salts
Source: PubMed Central journal article supplement (PMC4941344; doi:10.18632/oncotarget.7696), 2016-02-25
Supplement: oncotarget-07-16688-s001.pdf [file oncotarget-07-16688-s001.pdf]

## APE1-mediated DNA damage repair provides survival advantage for esophageal adenocarcinoma cells in response to acidic bile salts

### Supplementary Materials

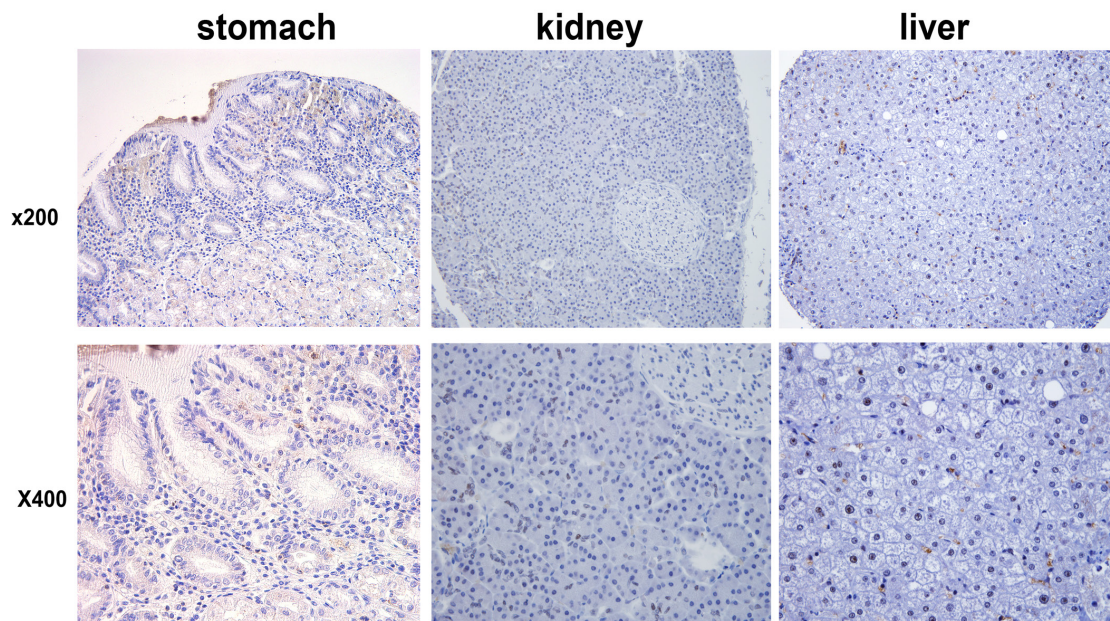

**Supplementary Figure S1: Evaluation of APE1 IHC staining in human normal tissues IHC staining for APE1 in normal human stomach, kidney, and liver tissues.** Normal stomach and kidney are negative for APE1 immunostaining, whereas normal liver has weak nuclear staining in few cells.

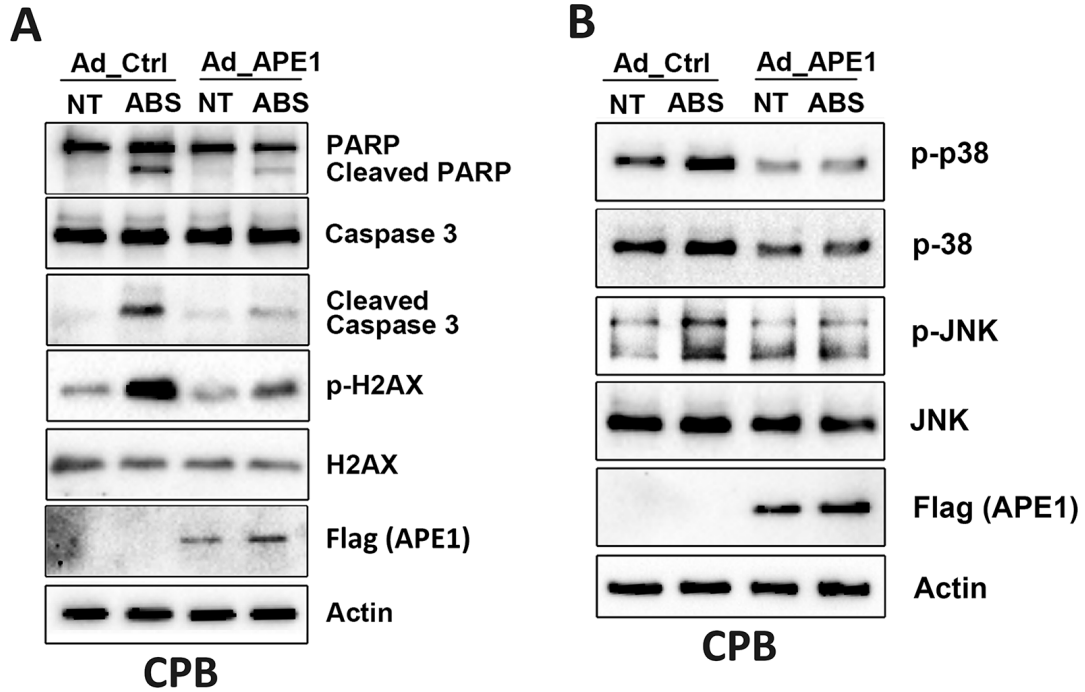

**Supplementary Figure S2: APE1 suppresses acidic bile salts-induced DNA damage and apoptosis through regulation JNK and p38 signaling in HGD.** CPB cells (HGD) were non-treated or treated with acidic bile salts (200  $\mu$ M, pH 4) for 30 min, followed by recovery in complete media for 3 h. Cell lysates were subjected to Western blot analyses of the indicated proteins (panels A and B). These data suggest that APE1 prosurvival function also occurs in HGD cells, similar to EAC cells.

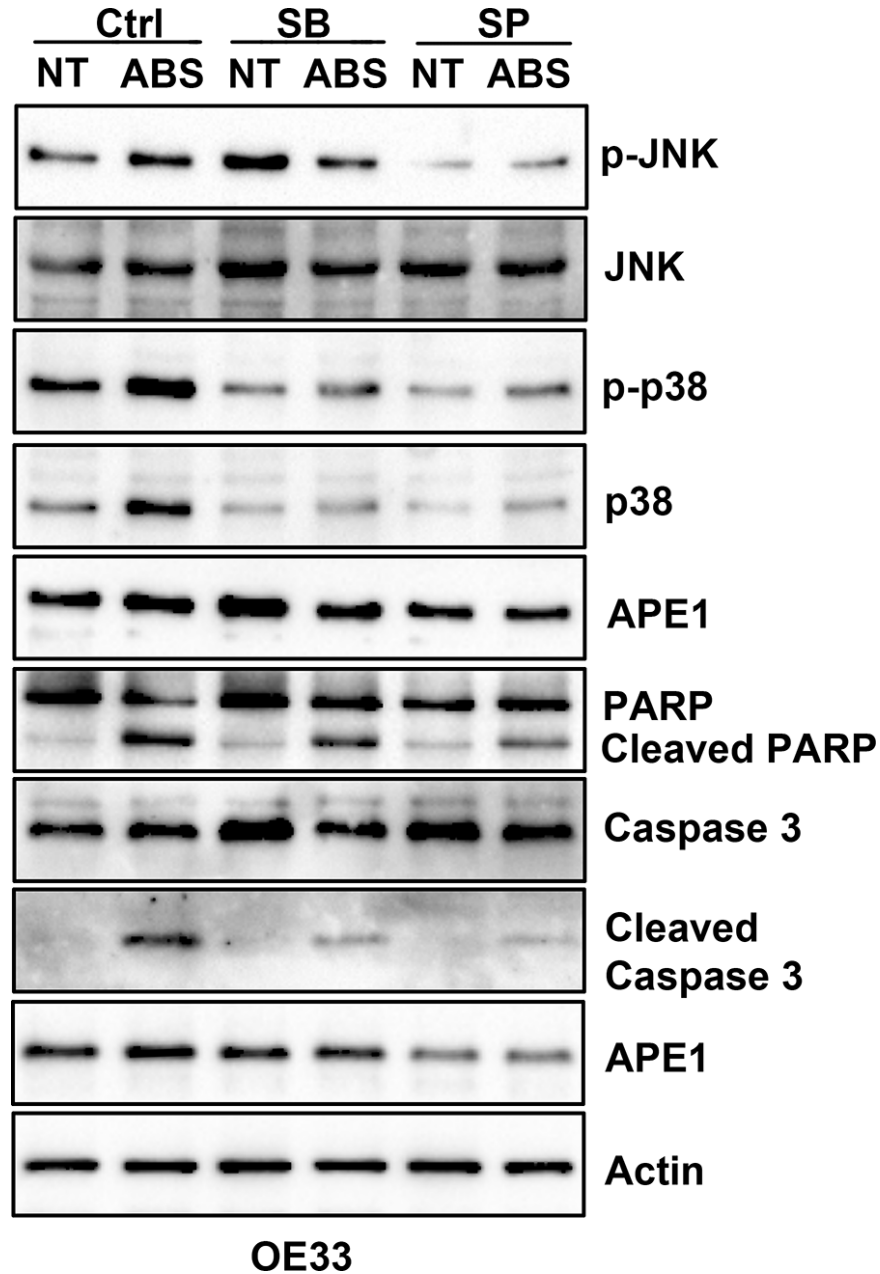

**Supplementary Figure S3: Acidic bile salts-induced apoptotic cell death requires activation of JNK and p38 kinases in OE33 cells.** OE33 cells were non-treated or treated with acidic bile salts (200  $\mu$ M, pH 4) alone or in combination with a JNK inhibitor, SP600125 (SP) (2.5  $\mu$ M), a p38 inhibitor, SB203580 (SB) (2.5  $\mu$ M), or vehicle DMSO (V) for 30 min, followed by recovery in complete media for 3 h post-treatments. Cell lysates were then subjected to Western blot analyses of the indicated proteins.

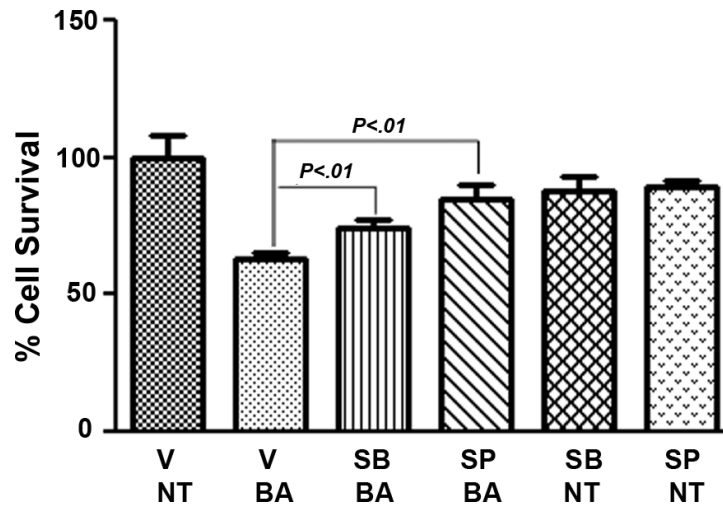

**Supplementary Figure S4: Inhibition of JNK or p38 kinases protects against acidic bile salts-induced cell death in EAC cells.** OE33 cells were non-treated or treated with acidic bile salts (200  $\mu$ M, pH 4) alone or in combination with JNK inhibitor SP (2.5  $\mu$ M), p38 inhibitor SB (2.5  $\mu$ M) or vehicle DMSO (V) for 30 min, followed by recovery in complete media for 24 h post-treatments. Cell lysates were then subjected to the CellTiter-Glo<sup>®</sup> Luminescent Cell Viability Assay.

**Supplementary Table S1: Immunohistochemistry analysis of APE1 expression levels on esophageal tissue microarrays**

|       | CES Score |     |      |
|-------|-----------|-----|------|
|       | 0–3       | 4–8 | 9–12 |
| NG    | 9         | 1   | 0    |
| NE    | 17        | 2   | 0    |
| BE    | 17        | 5   | 0    |
| BD    | 2         | 7   | 2    |
| EAC** | 60        | 36  | 34   |

CES [1], composite expression score; NG, normal gastric; NE, normal esophagus; BE, non-dysplastic Barrett’s esophagus; BD, Barrett’s dysplasia; EAC, esophageal adenocarcinoma. \*\* $P < .01$ .

## REFERENCES

1. Mukherjee K, Peng D, Brifkani Z, Belkhiri A, Pera M, Koyama T, Koehler EA, Revetta FL, Washington MK, El-Rifai W. Dopamine and cAMP regulated phosphoprotein MW 32 kDa is overexpressed in early stages of gastric tumorigenesis. *Surgery*. 2010; 148:354–363.
